# Supplementary material
Source: Research Square preprint supplement (doi:10.21203/rs.3.rs-9023509/v1)
Supplement: Supplementary file 2 [file 1cd129e194b6546316e49b8a.docx]

**Table S3.** System of landmarks and semilandmarks used to quantify the head shape variation of the species of the Mexican High Land Clade in dorsal, lateral and ventral view.

| **Dorsal view** | | |
| --- | --- | --- |
| **Number** | **Type** | **Description** |
| 1 | II | Rostral scale |
| 2 | I | Contact among the rostral scale and both internal scales |
| 3 | I | Contact among the internasal scales with the prefrontal scales |
| 4 | I | Contact between the postnasal scale and the nasal scale, left side |
| 5 | I | Contact between postnasal scale and the nasal scale, right side |
| 6 | I | Contact among the preocular, supraocular and prefrontal scales, left side |
| 7 | I | Contact among the preocular, supraocular and prefrontal, right side |
| 8 | I | Contact among left prefrontal, front and supraocular scales |
| 9 | I | Contact among right prefrontal, front and supraocular scales |
| 10 | I | Contact among frontal and both prefrontal scales |
| 11 | I | Contact between supraocular and left postocular scales |
| 12 | I | Contact between supraocular and right postocular scales |
| 13 | I | Contact among supraocular, postocular and left parietal scales |
| 14 | I | Contact among supraocular, postocular and right parietal scales |
| 15 | I | Contact among frontal, parietal and left supraocular scales |
| 16 | I | Contact among frontal, parietal and right supraocular scales |
| 17 | I | Contact among postocular, temporal and left parietal scales |
| 18 | I | Contact among postocular, temporal and right parietal scales |
| 19 | I | Contact among frontal and both parietal scales |
| 20 | I | Contact between both parietal scales |
| 21 | III | 1-last supralabial left (18 semilandmarks) |
| 22 | III | 1-last supralabial right (18 semilandmarks) |
| 23 | III | 17-20 (12 semilandmarks) |
| 24 | III | 18-20 (12 semilandmarks) |

**Table S3.** System of landmarks and semilandmarks used to quantify the head shape variation of the species of the Mexican High Land Clade in dorsal, lateral and ventral view.

| **Lateral view** | | |
| --- | --- | --- |
| **Number** | **Type** | **Description** |
| 1 | I | Contact among internasal, prenasal and rostral scales |
| 2 | I | Contact among supralabial, prenasal and rostral scales |
| 3 | I | Contact among prenasal, postnasal and internasal scales |
| 4 | I | Contact among prenasal, postnasal and supralabial scales |
| 5 | I | Contact among postnasal, internasal and prefrontal scales |
| 6 | I | Contact among postnasal, prefrontal and loreal scales |
| 7 | I | Contact among postnasal, loreal and supralabial scales |
| 8 | I | Contact among postnasal, preocular and prefrontal scales |
| 9 | I | Contact among preocular, loreal and supralabial scales |
| 10 | I | Contact among prefrontal, supraocular and preocular scales |
| 11 | I | Contact among supralabial scale, preocular scales and eye |
| 12 | I | Contact among preocular scale, supraocular scales and eye |
| 13 | I | Contact between supralabial scale and eye |
| 14 | I | Contact among supralabial scale, postocular scales and eye |
| 15 | I | Contact between supraocular scale, postocular scale and eye |
| 16 | I | Contact among supraocular, postocular and parietal scales |
| 17 | I | Contact between last supralabial and last infralabial scales |
| 18 | III | 1-17 (20 semilandmarks) |
| 19 | III | 1-16 (10 semilandmarks) |

**Table S3.** System of landmarks and semilandmarks used to quantify the head shape variation of the species of the Mexican High Land Clade in dorsal, lateral and ventral view.

| **Ventral view** | | |
| --- | --- | --- |
| **Number** | **Type** | **Description** |
| 1 | II | Mental scale |
| 2 | I | Contact between mental and infralabial scales, left side |
| 3 | I | Contact between mental and infralabial scales, right side |
| 4 | I | Contact among mental and infralabial scales |
| 5 | I | Contact among the first and second infralabial scales with the first genial shield, left side |
| 6 | I | Contact among the first and second infralabial scales with the first genial shield, right side |
| 7 | I | Contact among second infralabial scales and the first genial shields |
| 8 | I | Contact among first and second genial shields and the infralabial scale, left side |
| 9 | I | Contact among first and second genial shields and the infralabial scale, right side |
| 10 | I | Contact among the first and the second genial shields |
| 11 | I | Contact among gular and infralabial scales with first genial shield, left side |
| 12 | I | Contact among gular and infralabial scales with first genial shield, right side |
| 13 | II | Posterior distal portion of the second left genial shield |
| 14 | II | Posterior distal portion of the second right genial shield |
