# Supplementary material
Source: Research Square preprint supplement (doi:10.21203/rs.3.rs-9023509/v1)
Supplement: Supplementary file 3 [file 7999d4108eacff7f741d48a4.docx]

**Appendix S1.** Protocol of DNA extraction, amplification and purification of each gene used in this study.

Each PCR occurred in a 25 μl reaction that include 0.5 μl of dNTP’s (2 mM), 0.25 U of Taq DNA polymerase, 0.5 μl each of forward and reverse primers (10 mM), 3 μl of MgCl2 (25 mM), 2.5 μl of 10X PCR buffer, 16.75 μl of double-distilled water, and 1 μl of template DNA.

The **CytB** and **ND4** fragments was carried out at 95° C for 1 min, followed by 37 cycles of 95° C for 30 sec, 30 sec of annealing at 52–54° C and an extension at 72° C for 30.

The **DNAH3** fragments were amplified using an initial 1 min 30s denaturation cycle at 94°C, followed by 30s denaturing at 94°C, 30s annealing at 51°C and 1 min 30s extension at 72°C for 5 cycles, followed by 30s denaturing at 94°C, 30s annealing at 0°C and 1 min 30s extension at 72°C for 5 cycles, followed by 30s denaturing at 94°C, 30s annealing at 49°C and 1 min 30s extension at 72°C f or 10 cycles, followed by 30s denaturing at 94°C, 30s annealing at 48°C and 1 min 30s extension at 72°C for 30 cycles, followed by a 7 min extension at 72°C.

Purifications were performed using Qiagen quick PCR Purification Kit (Qiagen Valencia, CA). Purified products were sequenced on an Applied Biosystems 3730/3730XL sequencer.

**ND4 F:** TAC GAC AAA CAG ACC TAA AAT C

**R:** TTA ATG ATT TTA GAT CTG TTT G

(Arevalo et al. 1994)

**CytB F:** CTG TGA TMT GAA AAC CAY CGT TGT

**R:** AAC CAC CGT TGT TAT TCA ACT

(Burbrink et al. 2000)

**DNAH3 F:** GGT AAA ATG ATA GAA GAY TAC TG

**R:** CTK GAG TTR GAH ACA ATK ATG CCAT

(Townsed et al. 2008)
