# Supplementary material
Source: Research Square preprint supplement (doi:10.21203/rs.3.rs-9023509/v1)
Supplement: Supplementary file 4 [file 81d1229a9c450723b3f62407.docx]

| **ID**  **Table S1.** Specimens considered in this study for molecular analysis. Accession numbers shown in bold indicate sequences generated for this study. | **Species** | **State** | **Latitude** | **Longitude** | **GenBank accesion number (ND4)** | **GenBank accesion number (CytB)** | **GenBank number (DNAH3)** |
| --- | --- | --- | --- | --- | --- | --- | --- |
| *N._ sipedon* | *Nerodia sipedon* |  |  |  | MT801373 | MT801576 |  |
| *S._ occipitomaculata* | *Storeria occipitomaculata* |  |  |  | KT884438.1 |  |  |
| *S._ storerioides* | *Storeria storerioides* |  |  |  | KT884442.1 |  |  |
| *S._ dekayi* | *Storeria dekayi* |  |  |  | KF258627.1 | KF258644 |  |
| *T._hamondi* | *Thamnophis hamondi* |  |  |  | AF420142.1 | AF420139.1 |  |
| *T._marcianus* | *Thamnophis marcianus* |  |  |  | KT884418.1 | AF402926.1 | EU402767.1 |
| *T._rufipunctatus* | *Thamnophis rufipunctatus* |  |  |  | KT884430.1 |  |  |
| *T._nigronuchalis* | *Thamnophis nigronuchalis* |  |  |  | KT884428 |  |  |
| 35007 | *Thamnophis errans* |  |  |  |  | EF417411.1 |  |
| EAL4837 | *Thamnophis exsul* |  |  |  |  | L33313.1 |  |
| OFV2333 | *Thamnophis cyrtopsis* | Querétaro |  |  | **PV389274** | **PV389325** |  |
| CIG1937 | *Thamnophis bogerti* | Oaxaca | 16.121632 | -96.505225 |  | PP273313.1 |  |
| CIG1936 | *Thamnophis bogerti* | Oaxaca | 16.121632 | -96.505225 |  | PP273312.1 |  |
| JAC21416 | *Thamnophis bogerti* | Oaxaca | 16.199167 | -96.421944 | **PV389275** | **PV389326** | **PV389384** |
| CIG1938 | *Thamnophis bogerti* | Oaxaca | 16.06937 | -96.577196 |  | PP273314.1 |  |
| JAC21421 | *Thamnophis bogerti* | Oaxaca | 16.199167 | -96.421944 | **PV389277** | **PV389328** |  |
| JAC21406 | *Thamnophis bogerti* | Oaxaca | 16.201389 | -96.405278 | **PV389276** | **PV389327** | **PV389385** |
| UOGV3952 | *Thamnophis conanti* | Veracruz | 18.642222 | -97.21277778 | **PV389279** | **PV389330** |  |
| UOGV3949 | *Thamnophis conanti* | Veracruz | 18.642222 | -97.21277778 | **PV389278** | **PV389329** | **PV389388** |
| LCM1338 | *Thamnophis conanti* | Puebla | 18.227222 | -96.95075 |  |  | **PV389387** |
| LOR102 | *Thamnophis conanti* | Veracruz | 18.689601 | -97.191876 |  |  | **PV389386** |
| LSUMZ40836 | *Thamnophis errans* | Durango | 23.80320836 | -105.3865174 | AF420124.1 | AF420121.1 |  |
| L33314.1 | *Thamnophis errans* |  |  |  |  | L33314.1 |  |
| CIG1862 | *Thamnophis errans* | Chihuahua | 26.194814 | -106.588628 | PP273366.1 | PP273328.1 |  |
| CIG1834 | *Thamnophis exsul* | Nuevo León | 23.836308 | -99.856751 | PP273365.1 |  |  |
| CASHERP218283 | *Thamnophis exsul* | Nuevo León | 23.81957585 | -99.84183808 | OK316133.1 | OK315843.1 |  |
| ART145 | *Thamnophis godmani* | Oaxaca | 18.15 | -96.983333 | **PV389281** | **PV389332** |  |
| JAC22768 | *Thamnophis godmani* | Oaxaca | 18.143522 | -97.063829 | **PV389280** | **PV389331** | **PV389389** |
| OFV2488 | *Thamnophis scalaris* | Puebla | 19.29804 | -97.65449 | **PV389306** | **PV389336** |  |
| AYCB49 | *Thamnophis scalaris* | Puebla | 19.270556 | -97.705833 | **PV389312** | **PV389360** | **PV389407** |
| OFV2342 | *Thamnophis scalaris* | Tlaxcala | 19.244722 | -98.37 |  | **PV389334** |  |
| AEVB57 | *Thamnophis scalaris* | Veracruz | 19.618235 | -97.023109 |  | **PV389361** |  |
| UOGV3930 | *Thamnophis scalaris* | Veracruz | 18.874168 | -97.206308 |  | **PV389365** | **PV389412** |
| ISZ0238 | *Thamnophis scalaris* | Puebla | 19.79685 | -97.53633 | **PV389299** | **PV389367** | **PV389405** |
| SFDG0047 | *Thamnophis scalaris* | Hidalgo | 20.064083 | -98.201944 | **PV389302** | **PV389354** | **PV389397** |
| LFHL0004 | *Thamnophis scalaris* | Puebla | 19.29804 | -97.65449 | **PV389309** | **PV389333** | **PV389409** |
| ORI91 | *Thamnophis scalaris* | Tlaxcala | 19.457667 | -98.351444 | **PV389305** | **PV389353** | **PV389398** |
| OFV2539 | *Thamnophis scalaris* | Hidalgo | 20.13301 | -98.52328 | **PV389283** | **PV389347** | **PV389403** |
| JLAL0085 | *Thamnophis scalaris* | Puebla | 20.041541 | -98.025991 | **PV389313** | **PV389351** |  |
| C80J6 | *Thamnophis scalaris* | Hidalgo | 20.198444 | -98.703306 | **PV389311** | **PV389339** |  |
| UOGV3932 | *Thamnophis scalaris* | Veracruz | 18.8741683 | -97.2063083 | **PV389314** | **PV389340** |  |
| scala0007 | *Thamnophis scalaris* | Estado de México | 19.321056 | -99.480119 |  | **PV389337** |  |
| OFV2154 | *Thamnophis scalaris* | Ciudad de México | 19.22175 | -99.275361 | **PV389285** | **PV389345** | **PV389392** |
| scala0002 | *Thamnophis scalaris* | Estado de México | 19.312093 | -99.687672 | **PV389292** |  | **PV389395** |
| UOGV2531 | *Thamnophis scalaris* | Morelos | 19.043917 | -99.303333 | **PV389310** | **PV389356** | **PV389396** |
| AYCB38 | *Thamnophis scalaris* | Estado de México | 19.346389 | -99.338611 | **PV389300** |  | **PV389394** |
| OFV2486 | *Thamnophis scalaris* | Ciudad de México | 19.135187 | -99.121477 | **PV389286** | **PV389349** | **PV389391** |
| CASHERP214292 | *Thamnophis scalaris* | Ciudad de México | 19.53865426 | -99.50472482 | AF420184.1 | OK315844.1 |  |
| CIG1738 | *Thamnophis scalaris* | Morelos | 19.08675 | -99.148971 | PP273359.1 | PP273330.1 |  |
| LFHL0005 | *Thamnophis scalaris* | Estado de México | 19.2092098 | -99.436542 | **PV389296** |  |  |
| C80J7 | *Thamnophis scalaris* | Hidalgo | 20.183722 | -98.731083 | **PV389294** | **PV389335** |  |
| AEVB43 | *Thamnophis scalaris* | Veracruz | 19.618235 | -97.023109 | **PV389282** | **PV389338** |  |
| OFV2343 | *Thamnophis scalaris* | Tlaxcala | 19.224441 | -98.315241 |  | **PV389341** |  |
| OFV2344 | *Thamnophis scalaris* | Estado de México | 19.2092098 | -99.436542 | **PV389303** | **PV389342** |  |
| DGM121 | *Thamnophis scalaris* | Puebla | 20.03666 | -98.04233 | **PV389297** | **PV389343** | **PV389408** |
| JCSG82 | *Thamnophis scalaris* | Veracruz | 18.821502 | -97.167852 | **PV389315** | **PV389344** | **PV389411** |
| UOGV2530 | *Thamnophis scalaris* | Morelos | 19.043917 | -99.303333 | **PV389298** | **PV389346** | **PV389401** |
| ORI83 | *Thamnophis scalaris* | Tlaxcala | 19.417983 | -98.126218 | **PV389288** | **PV389348** | **PV389404** |
| UOGV1708 | *Thamnophis scalaris* | Veracruz | 19.040001 | -97.200871 | **PV389284** | **PV389350** | **PV389414** |
| DGM134 | *Thamnophis scalaris* | Puebla | 20.02114 | -98.0403 | **PV389307** | **PV389352** | **PV389399** |
| ORI62 | *Thamnophis scalaris* | Tlaxcala | 19.4714 | -98.47405 | **PV389304** | **PV389355** |  |
| OFV2552 | *Thamnophis scalaris* | Hidalgo | 20.13301 | -98.52328 | **PV389291** | **PV389357** | **PV389402** |
| OFV2553 | *Thamnophis scalaris* | Hidalgo | 20.13301 | -98.52328 | **PV389290** | **PV389358** |  |
| RICB145 | *Thamnophis scalaris* | Puebla | 20.02935 | -98.02901 | **PV389308** | **PV389359** | **PV389406** |
| OFV2484 | *Thamnophis scalaris* | Estado de México | 19.318482 | -99.488494 | **PV389301** | **PV389362** | **PV389393** |
| OFV2331 | *Thamnophis scalaris* | Ciudad de México | 19.220583 | -99.275972 | **PV389287** | **PV389363** | **PV389390** |
| UOGV1713 | *Thamnophis scalaris* | Veracruz | 19.028912 | -97.202645 |  | **PV389364** | **PV389413** |
| UOGV2321 | *Thamnophis scalaris* | Puebla | 19.754236 | -98.082409 | **PV389289** | **PV389366** | **PV389410** |
| ORI19 | *Thamnophis scalaris* | Tlaxcala | 19.457667 | -98.351444 |  |  | **PV389400** |
| ISZ294 | *Thamnophis scalaris* | Ciudad de México | 19.220306 | -99.302583 | **PV389293** |  |  |
| scala0001 | *Thamnophis scalaris* | Estado de México | 19.313491 | -99.686664 | **PV389295** |  |  |
| MZFC31164 | *Thamnophis scaliger* | Ciudad de México | 19.76716 | -99.85629 |  | **PV389370** | **PV389415** |
| scali0004 | *Thamnophis scaliger* | Estado de México | 19.314048 | -99.685914 | **PV389320** | **PV389374** |  |
| scali0005 | *Thamnophis scaliger* | Estado de México | 19.315232 | -99.687159 |  | **PV389373** |  |
| CIG1789 | *Thamnophis scaliger* | Guanajuato | 19.664948 | -100.750429 | PP273361.1 | PP273338.1 |  |
| scali0008 | *Thamnophis scaliger* | Estado de México | 19.312741 | -99.686578 |  | **PV389371** |  |
| CIG1740 | *Thamnophis scaliger* | Ciudad de México | 19.77559 | -99.845494 |  | PP273340.1 |  |
| UOGV3311 | *Thamnophis scaliger* | Ciudad de México | 19.56245719 | -99.30488375 |  | **PV389372** |  |
| CIG1989 | *Thamnophis scaliger* | Michoacán | 21.71878 | -101.50776 | PP273367.1 | PP273341.1 |  |
| CAS214293 | *Thamnophis scaliger* | Ciudad de México | 19.56233821 | -99.30581958 | OK315897.1 | OK315845.1 |  |
| scali0009 | *Thamnophis scaliger* | Estado de México | 19.312741 | -99.686578 | **PV389318** | **PV389368** |  |
| CIG1739 | *Thamnophis scaliger* | Ciudad de México | 19.77559 | -99.845494 |  | **PP273339.1** |  |
| scali0006 | *Thamnophis scaliger* | Estado de México | 19.312741 | -99.686578 |  | **PV389369** |  |
| scali00011 | *Thamnophis scaliger* | Estado de México | 19.312741 | -99.686578 | **PV389317** | **PV389375** |  |
| scali0003 | *Thamnophis scaliger* | Estado de México | 19.314806 | -99.68641 | **PV389316** | **PV389376** |  |
| scali00010 | *Thamnophis scaliger* | Estado de México | 19.312741 | -99.686578 |  | **PV389377** |  |
| MZFC31165 | *Thamnophis scaliger* | Ciudad de México | 19.76716 | -99.85629 | **PV389319** | **PV389378** | **PV389416** |
| OFV2157 | *Thamnophis scaliger* | Ciudad de México | 19.328056 | -99.239639 |  | **PV389379** | **PV389417** |
| JAC22560 | *Thamnophis sumichrasti* | Veracruz | 18.9732 | -97.1449 |  | **PV389380** |  |
| MZFC8869 | *Thamnophis sumichrasti* | Querétaro | 21.49666667 | -99.17888889 | **PV389324** | **PV389381** |  |
| JCSG247 | *Thamnophis sumichrasti* | Veracruz | 18.61861111 | -97.0475 | **PV389322** | **PV389382** | **PV389418** |
| UOGV3537 | *Thamnophis sumichrasti* | Veracruz | 18.82604085 | -97.17846884 | **PV389323** | **PV389383** |  |
