# Supplementary material
Source: Research Square preprint supplement (doi:10.21203/rs.3.rs-9023509/v1)
Supplement: Supplementary file 5 [file d177afc887f36d282cd98001.docx]

| ID  **Table S2.** Specimens considered in this study for geometric morphometry analysis. | Code | Sp | Latitude | Longitude |
| --- | --- | --- | --- | --- |
| MZFC29191 | bogerHA0005 | *Thamnophis bogerti* | 18.1795 | -96.90630556 |
| OFV1023 | bogerMA0001 | *Thamnophis bogerti* | 18.14816667 | -97.00566667 |
| MZFC28429 | bogerMA0002 | *Thamnophis bogerti* | 17.58709 | -96.48387 |
| MZFC16137 | bogerMA0003 | *Thamnophis bogerti* | 16.19917 | -96.42194 |
| MZFC03214 | conanHA0001 | *Thamnophis conanti* | 18.71893279 | -97.31968176 |
| MZFC0726 | conanHA0002 | *Thamnophis conanti* | 18.69138918 | -97.33453145 |
| MZFC11262 | conanHA0004 | *Thamnophis conanti* | 18.64509334 | -97.36680198 |
| MZFC0726 | conanHA0005 | *Thamnophis conanti* | 18.69138918 | -97.33453145 |
| MZFC26372 | conanHA0008 | *Thamnophis conanti* | 18.22722 | -96.95075 |
| MZFC17195 | conanHA0010 | *Thamnophis conanti* | 18.323 | -97.007 |
| MZFC03215 | conanMA0007 | *Thamnophis conanti* |  |  |
| IBH15269 | erranHA0005 | *Thamnophis errans* | 23.79512672 | -105.3523894 |
| IBH15270 | erranHA0006 | *Thamnophis errans* | 23.79512672 | -105.3523894 |
| IBH2835 | erranHA0007 | *Thamnophis errans* | 23.62905475 | -103.9369548 |
| IBH15328 | erranHC0004 | *Thamnophis errans* | 24.03347868 | -104.7443962 |
| UANL6742 | exsulHA0004 | *Thamnophis exsul* | 23.83362557 | -99.87073149 |
| UANL6821 | exsulHA0005 | *Thamnophis exsul* | 23.73947837 | -99.84133519 |
| UANL5878 | exsulHA0007 | *Thamnophis exsul* | 23.95212691 | -99.76933554 |
| UANL4107 | exsulMA0002 | *Thamnophis exsul* | 23.95417147 | -99.76385013 |
| OFV0619 | godmaHA0001 | *Thamnophis godmani* | 17.55833 | -99.685 |
| MZFC02938 | godmaHA0002 | *Thamnophis godmani* | 17.55615679 | -99.68789951 |
| MZFC02935 | godmaHA0004 | *Thamnophis godmani* | 17.5560791 | -99.68260777 |
| MZFC02929 | godmaHA0012 | *Thamnophis godmani* | 17.55509539 | -99.6841445 |
| MZFC02937 | godmaMA0003 | *Thamnophis godmani* | 17.55523051 | -99.68533663 |
| MZFC02940 | godmaMA0005 | *Thamnophis godmani* | 17.55523051 | -99.68533663 |
| MZFC02922 | godmaMA0006 | *Thamnophis godmani* | 17.55523051 | -99.68533663 |
| MZFC02933 | godmaMA0007 | *Thamnophis godmani* | 17.55756873 | -99.69541896 |
| MZFC02930 | godmaMA0009 | *Thamnophis godmani* | 17.55756873 | -99.69541896 |
| MZFC02928 | godmaMA0013 | *Thamnophis godmani* | 17.5653626 | -99.68288417 |
| OFV1596 | scalaHA0005 | *Thamnophis scalaris* | 19.04984694 | -99.30937571 |
| OFV2153 | scalaHA0009 | *Thamnophis scalaris* | 19.220583 | -99.275972 |
| OFV2155 | scalaHA0010 | *Thamnophis scalaris* | 19.221361 | -99.276611 |
| OFV2154 | scalaHA0012 | *Thamnophis scalaris* | 19.22175 | -99.275361 |
| EBUAP0013 | scalaHA0013 | *Thamnophis scalaris* | 19.16698691 | -98.50023452 |
| EBUAP0369 | scalaHA0015 | *Thamnophis scalaris* | 19.11438041 | -98.39501982 |
| EBUAP0512 | scalaHA0016 | *Thamnophis scalaris* | 19.22677497 | -98.04936922 |
| EBUAP2455 | scalaHA0018 | *Thamnophis scalaris* | 20.08574921 | -98.04412756 |
| EBUAP2706 | scalaHA0021 | *Thamnophis scalaris* | 19.29604233 | -97.24534478 |
| MZFC07603 | scalaHA0022 | *Thamnophis scalaris* | 19.16167 | -99.61667 |
| MZFC07605 | scalaHA0023 | *Thamnophis scalaris* | 19.16167 | -99.61667 |
| MZFC36502 | scalaHA0025 | *Thamnophis scalaris* | 19.49888 | -97.21166 |
| MZFC20590 | scalaHA0026 | *Thamnophis scalaris* | 19.35590779 | -99.32506817 |
| MZFC07606 | scalaHA0028 | *Thamnophis scalaris* | 19.15092497 | -99.22110258 |
| MZFC21294 | scalaHA0033 | *Thamnophis scalaris* | 19.54401063 | -99.07303497 |
| OFV2539 | scalaHA0035 | *Thamnophis scalaris* | 20.13301 | -98.52328 |
| OFV2552 | scalaHA0036 | *Thamnophis scalaris* | 20.13301 | -98.52328 |
| LFHL0001 | scalaHA0037 | *Thamnophis scalaris* | 19.1351867 | -99.1214767 |
| MZFC23051 | scalaHA0038 | *Thamnophis scalaris* | 19.79158333 | -97.54594444 |
| MZFC03265 | scalaHA0040 | *Thamnophis scalaris* | 19.33678919 | -98.7195958 |
| MZFC23047 | scalaHA0042 | *Thamnophis scalaris* | 19.79738889 | -97.54738889 |
| MZFC31768 | scalaHA0043 | *Thamnophis scalaris* | 19.41523 | -101.51436 |
| MZFC22883 | scalaHA0046 | *Thamnophis scalaris* | 19.031 | -97.13855556 |
| MZFC17972 | scalaHA0051 | *Thamnophis scalaris* | 19.33333 | -99.38333 |
| OFV2495 | scalaHA0057 | *Thamnophis scalaris* | 19.24682966 | -99.22202368 |
| OFV2496 | scalaHA0058 | *Thamnophis scalaris* | 19.24682966 | -99.22202368 |
| OFV2498 | scalaHA0060 | *Thamnophis scalaris* | 19.24682966 | -99.22202368 |
| MZFC07601 | scalaHA0064 | *Thamnophis scalaris* | 19.16167 | -99.61667 |
| MZFC23289 | scalaMA0001 | *Thamnophis scalaris* | 19.22030556 | -99.30258333 |
| MZFC03268 | scalaMA0002 | *Thamnophis scalaris* | 20.19813179 | -98.7158875 |
| MZFC29700 | scalaMA0003 | *Thamnophis scalaris* | 19.04391667 | -99.30333333 |
| MZFC00573 | scalaMA0004 | *Thamnophis scalaris* | 19.28683889 | -99.19154994 |
| AYCB38 | scalaMA0006 | *Thamnophis scalaris* | 19.34638889 | -99.33861111 |
| OFV2335 | scalaMA0007 | *Thamnophis scalaris* | 19.08833333 | -98.60680556 |
| OFV2334 | scalaMA0008 | *Thamnophis scalaris* | 19.10791667 | -98.62683333 |
| OFV2156 | scalaMA0011 | *Thamnophis scalaris* | 19.221361 | -99.276611 |
| EBUAP2217 | scalaMA0017 | *Thamnophis scalaris* | 20.09381005 | -98.06541357 |
| EBUAP2523 | scalaMA0019 | *Thamnophis scalaris* | 20.03094974 | -98.04411685 |
| MZFC07602 | scalaMA0024 | *Thamnophis scalaris* | 19.4 | -99.70667 |
| MZFC00512 | scalaMA0027 | *Thamnophis scalaris* | 19.09818963 | -99.60363667 |
| MZFC03108 | scalaMA0030 | *Thamnophis scalaris* | 19.24658148 | -99.22194987 |
| MZFC03109 | scalaMA0031 | *Thamnophis scalaris* | 19.34714249 | -98.67115005 |
| MZFC22681 | scalaMA0032 | *Thamnophis scalaris* | 19.3712398 | -100.147601 |
| MZFC22686 | scalaMA0034 | *Thamnophis scalaris* | 19.8649 | -99.80128333 |
| MZFC03460 | scalaMA0039 | *Thamnophis scalaris* | 19.28026972 | -99.18917072 |
| MZFC00069 | scalaMA0044 | *Thamnophis scalaris* | 19.23434916 | -99.16102735 |
| MZFC31767 | scalaMA0047 | *Thamnophis scalaris* | 19.41805 | -101.50947 |
| OFV2484 | scalaMA0052 | *Thamnophis scalaris* | 19.3184824 | -99.4884941 |
| OFV2493 | scalaMA0055 | *Thamnophis scalaris* | 19.43443333 | -101.5124139 |
| OFV2494 | scalaMA0056 | *Thamnophis scalaris* | 19.43443333 | -101.5124139 |
| OFV2497 | scalaMA0059 | *Thamnophis scalaris* | 19.24682966 | -99.22202368 |
| OFV2488 | scalaMA0063 | *Thamnophis scalaris* | 19.29804 | -97.65449 |
| MZFC02002 | scaliHA0001 | *Thamnophis scaliger* | 19.35453763 | -99.17354265 |
| MZFC02003 | scaliHA0002 | *Thamnophis scaliger* | 19.35453763 | -99.17354265 |
| MZFC03267 | scaliHA0005 | *Thamnophis scaliger* | 19.47073106 | -99.20011003 |
| MZFC16696 | scaliHA0006 | *Thamnophis scaliger* | 19.74255478 | -99.9079266 |
| MZFC0630 | scaliHA0007 | *Thamnophis scaliger* | 19.26239863 | -99.23193794 |
| MZFC0505 | scaliHA0013 | *Thamnophis scaliger* | 19.46309939 | -99.07907661 |
| MZFC22696 | scaliHA0018 | *Thamnophis scaliger* | 19.77773333 | -99.58611667 |
| MZFC23154 | scaliHA0019 | *Thamnophis scaliger* | 19.74286667 | -99.88861667 |
| MZFC16698 | scaliHA0020 | *Thamnophis scaliger* | 19.71667 | -99.88333 |
| MZFC23144 | scaliHA0023 | *Thamnophis scaliger* | 19.90533333 | -99.87823333 |
| OFV2672 | scaliHA0033 | *Thamnophis scaliger* | 19.31169383 | -99.69167393 |
| OFV2674 | scaliHA0035 | *Thamnophis scaliger* | 19.80650886 | -99.51432124 |
| MZFC23145 | scaliMA0008 | *Thamnophis scaliger* | 19.76825 | -99.8569 |
| MZFC11324 | scaliMA0010 | *Thamnophis scaliger* | 21.76005672 | -102.3023846 |
| MZFC11323 | scaliMA0012 | *Thamnophis scaliger* | 21.76005672 | -102.3023846 |
| MZFC22687 | scaliMA0021 | *Thamnophis scaliger* | 19.73333 | -99.88333 |
| MZFC23435 | scaliMA0022 | *Thamnophis scaliger* | 19.72140726 | -99.77756909 |
| MZFC03266 | scaliMA0024 | *Thamnophis scaliger* | 19.50247413 | -99.22006841 |
| MZFC31164 | scaliMA0026 | *Thamnophis scaliger* | 19.76716 | -99.85629 |
| MZFC00067 | scaliMA0028 | *Thamnophis scaliger* | 19.46375701 | -99.07276578 |
| OFV2499 | scaliMA0031 | *Thamnophis scaliger* | 19.54523889 | -101.3484167 |
| OFV2671 | scaliMA0032 | *Thamnophis scaliger* | 19.31169383 | -99.69167393 |
| OFV2673 | scaliMA0034 | *Thamnophis scaliger* | 19.31169383 | -99.69167393 |
| OFV2675 | scaliMA0036 | *Thamnophis scaliger* | 19.80650886 | -99.51432124 |
| MZFC21089 | sumicHA0001 | *Thamnophis sumichrasti* | 20.98882333 | -98.65079173 |
| MZFC31264 | sumicHA0002 | *Thamnophis sumichrasti* | 20.66161 | -98.69281 |
| MZFC20485 | sumicHA0007 | *Thamnophis sumichrasti* | 20.35436 | -98.51403 |
| MZFC03421 | sumicHA0008 | *Thamnophis sumichrasti* | 20.66925145 | -98.68750233 |
| EBUAP1165 | sumicHA0013 | *Thamnophis sumichrasti* | 19.96418547 | -97.78543398 |
| MZFC04659 | sumicMA0003 | *Thamnophis sumichrasti* | 20.79275489 | -98.73958547 |
| MZFC31258 | sumicMA0004 | *Thamnophis sumichrasti* | 20.67526 | -98.69163 |
