# Supplementary material
Source: Research Square preprint supplement (doi:10.21203/rs.3.rs-9023509/v1)
Supplement: Supplementary file 6 [file f9317370435c823c4d8fdcd1.docx]

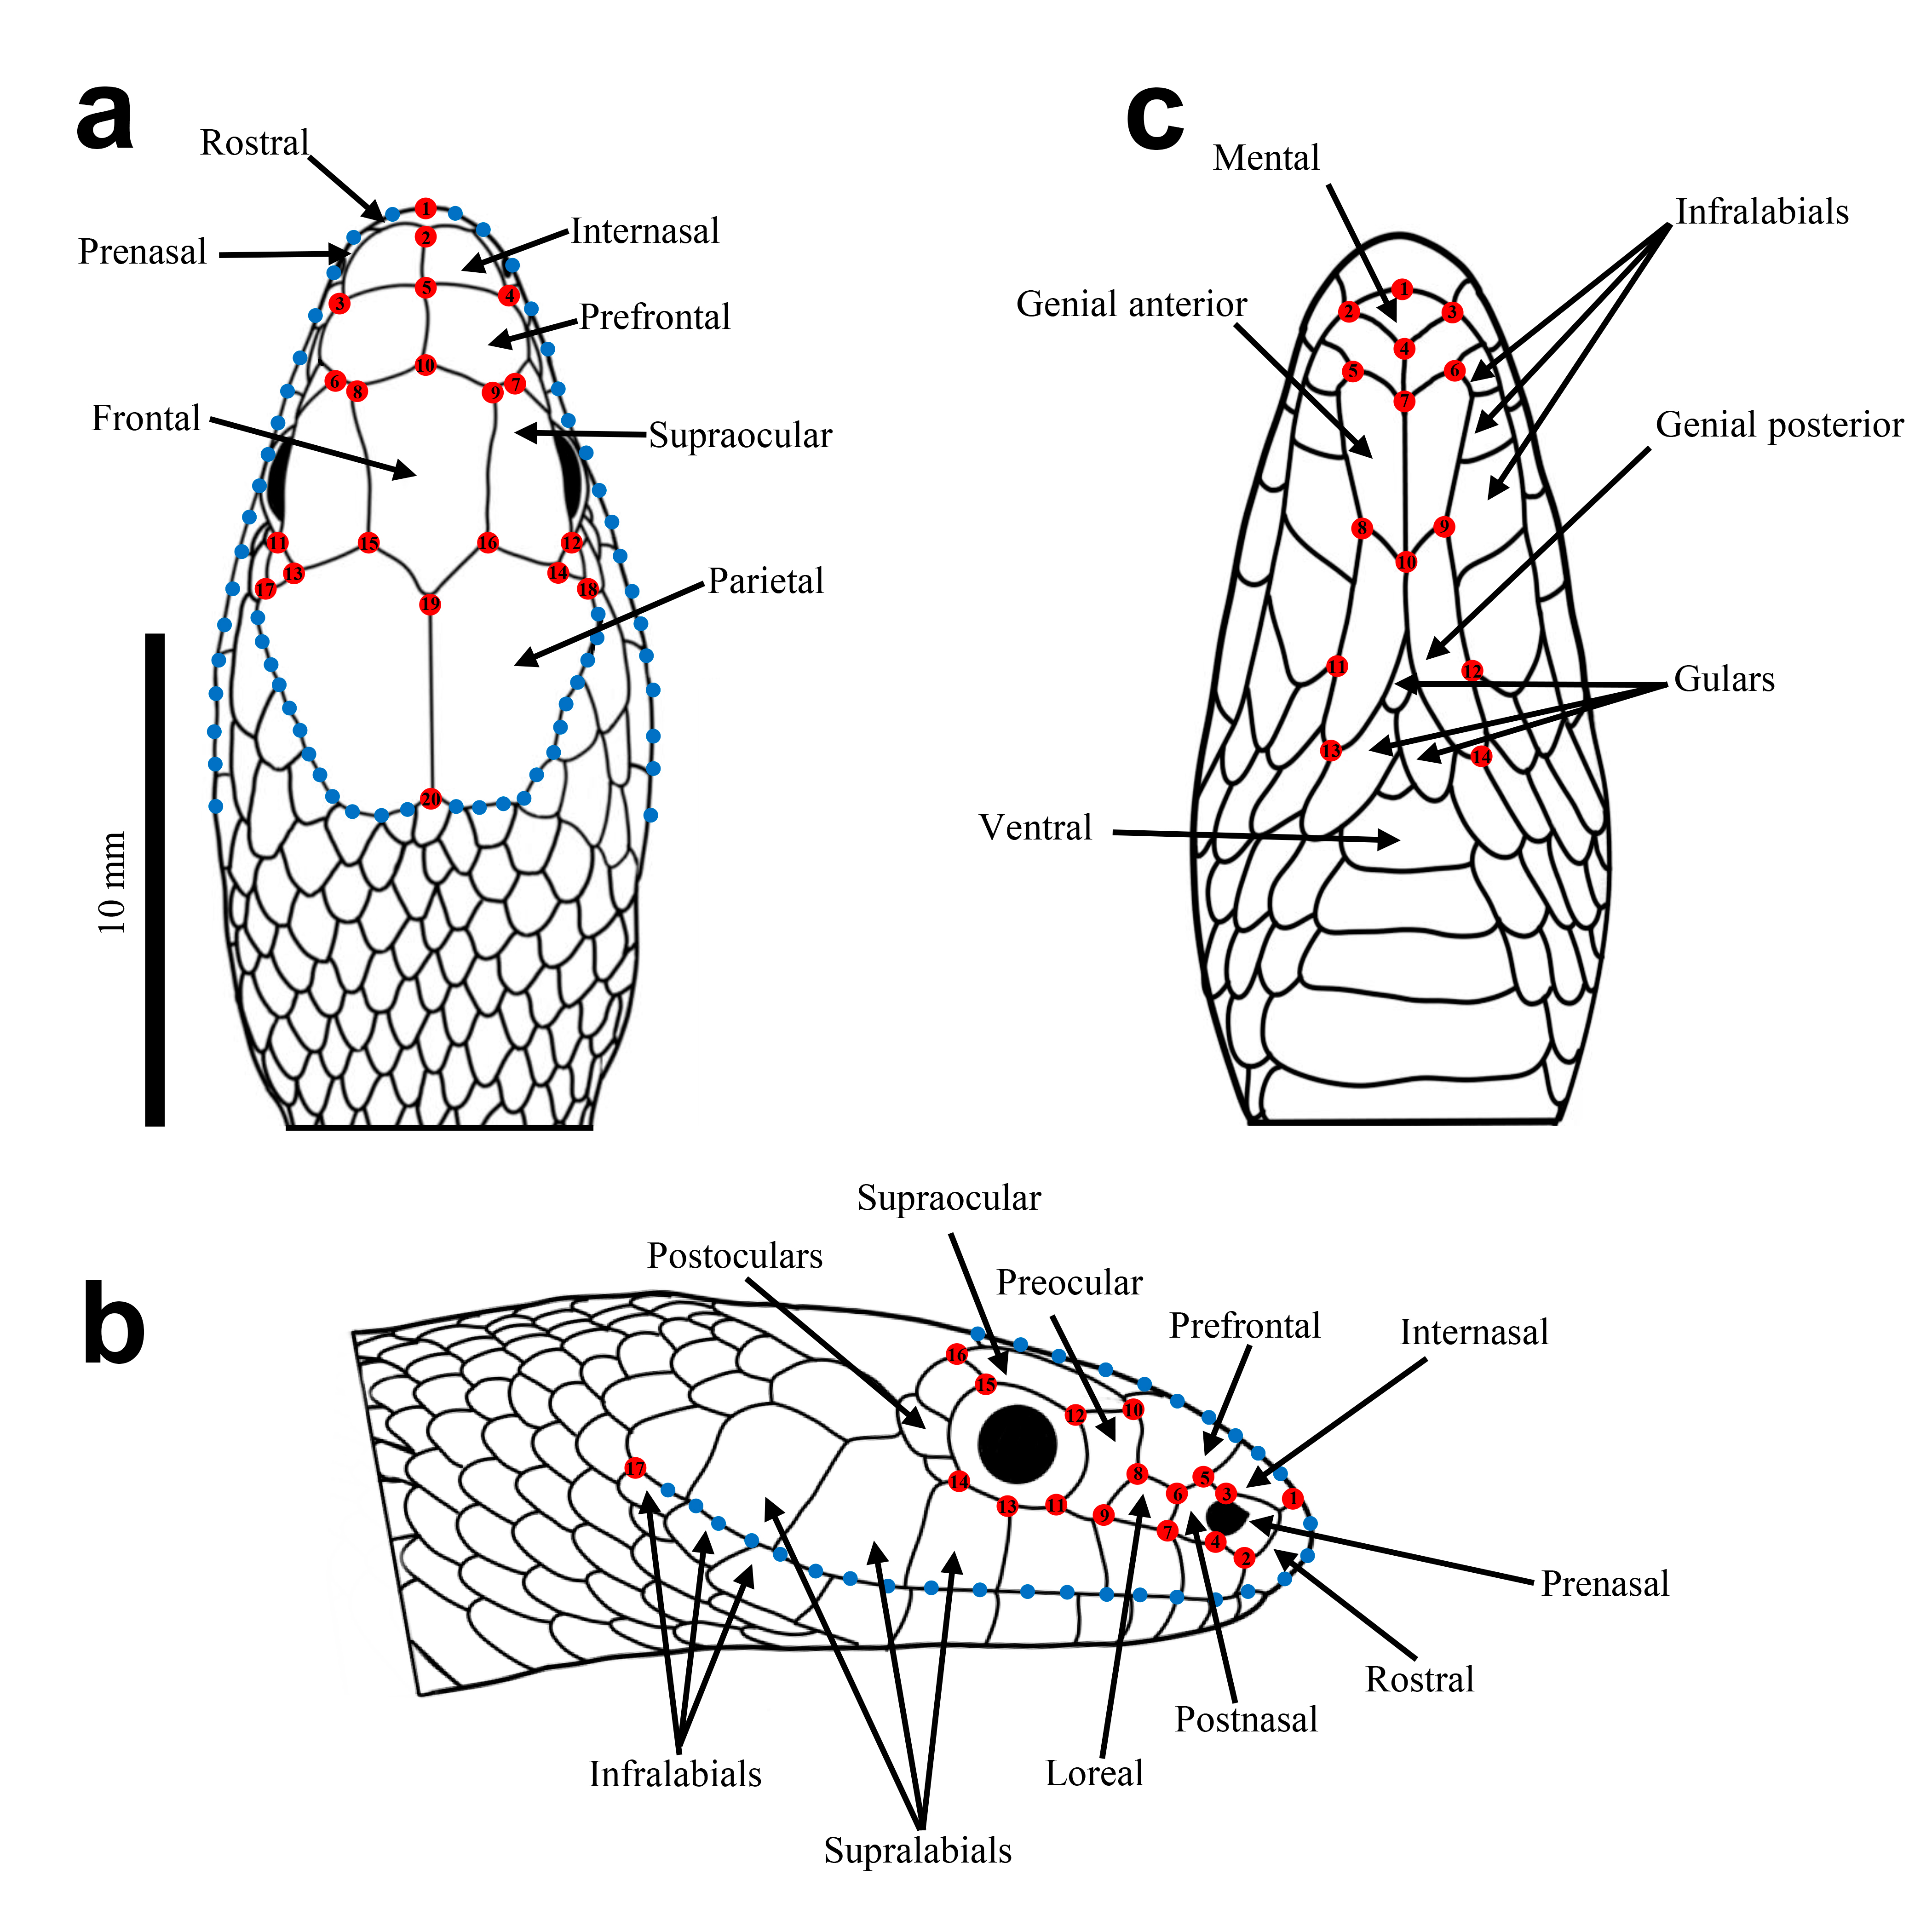


**Figure S2**. System of landmarks (red) and semilandmarks (blue) used to quantify variation in head shape among species of the Mexican Highland Clade, shown in dorsal (a), lateral (b), and ventral (c) views.
