# Supplementary material
Source: Research Square preprint supplement (doi:10.21203/rs.3.rs-9023509/v1)
Supplement: Supplementary file 7 [file fa57e46d8a06023bf82a9e70.docx]

**Table S4.** Percentage contribution of climatic variables for each species in the Mexican High Land Clade. The Bio1 to Bio7 variables are associated with temperature, while the Bio12 to Bio16 variables are associated with precipitation.

|  | **Bio1** | **Bio3** | **Bio4** | **Bio5** | **Bio6** | **Bio7** | **Bio12** | **Bio13** | **Bio14** | **Bio15** | **Bio16** |
| --- | --- | --- | --- | --- | --- | --- | --- | --- | --- | --- | --- |
| *T. bogerti* | 15.7 |  |  | 1.6 | 70.4 |  | 0 | 4.1 | 8.1 |  |  |
| *T. conanti* |  |  | 13.1 | 38.1 |  |  |  |  |  |  | 48.8 |
| *T. errans* | 31.6 |  |  | 53.5 | 7.3 |  | 2.5 | 1.4 | 3.7 |  |  |
| *T. exsul* |  | 4.9 |  |  | 27.4 | 37 |  |  | 6.2 | 24.6 |  |
| *T. godmani* | 45.3 |  |  | 49 | 4.6 |  | 0.1 | 0 | 1 |  |  |
| *T. scalaris* | 24.2 |  |  | 21.6 | 46.9 |  | 1.9 | 4.2 | 1.1 |  |  |
| *T. scaliger* | 29.2 |  |  | 35.7 | 9.8 |  | 5 | 10.6 | 9.8 |  |  |
| *T. sumichrasti* | 3 |  |  | 8.7 | 16.2 |  | 11.3 | 3.2 | 57.7 |  |  |
